# Supplementary material
Source: Research Square preprint supplement (doi:10.21203/rs.3.rs-9802708/v1)

**Assessment of exposure to essential and non-essential elements through concentrations in tissues of *Chelonia mydas* (green turtles) from the South Atlantic, Northeast Brazil**

Journal: Biological Trace Element Research

Midiã S. Rodrigues<sup>1,2</sup>, Iago J.S. da Silva<sup>3</sup>, Cristina F. da Fonseca<sup>4</sup>, Pierre C. Soares<sup>5\*</sup>, Múcio L.B. Fernandes<sup>6</sup>, Geraldo J.B. de Moura<sup>1,2,7</sup>

<sup>1</sup>Programa de Pós-Graduação em Ciência Animal Tropical (PGCAT), Universidade Federal Rural de Pernambuco (UFRPE), Rua Dom Manoel de Medeiros, s/n, 52171-9000, Dois Irmãos, Recife, Pernambuco, Brazil

<sup>2</sup>Laboratório de Estudos Herpetológicos e Paleherpetológicos (LEHP), Universidade Federal Rural de Pernambuco (UFRPE), Rua Dom Manoel de Medeiros, s/n, 52171-9000, Dois Irmãos, Recife, Pernambuco, Brazil

<sup>3</sup>Unidade Acadêmica de Belo Jardim (UABJ), Universidade Federal Rural de Pernambuco (UFRPE), Rodovia PE 166, km 5, Euno Andrade da Silva, 55156-580, Belo Jardim, Pernambuco, Brazil

<sup>4</sup>Laboratório de Parasitologia (LAPAR), Departamento de Biologia, Universidade Federal Rural de Pernambuco (UFRPE), Rua Dom Manoel de Medeiros, s/n, 52171-9000, Dois Irmãos, Recife, Pernambuco, Brazil

<sup>5</sup>Departamento de Medicina Veterinária, Universidade Federal Rural de Pernambuco (UFRPE), Rua Dom Manoel de Medeiros, s/n, 52171-9000, Dois Irmãos, Recife, Pernambuco, Brazil

<sup>6</sup>Laboratório de Estudos Ambientais, Universidade de Pernambuco (UPE), Rua Amaro Maltês de Farias, 55800-000, Nazaré da Mata, Pernambuco, Brazil

<sup>7</sup>Programa de Pós-Graduação em Ecologia (PPGE), Universidade Federal Rural de Pernambuco (UFRPE), Rua Dom Manoel de Medeiros, s/n, 52171-9000, Dois Irmãos, Recife, Pernambuco, Brazil

\*Corresponding author:

Pierre C. Soares: [pierre.soares@ufrpe.br](mailto:pierre.soares@ufrpe.br).

## Supplementary Material:

Plotting of PCA scores and loadings for kidney samples

**Fig. S1** Scores plot of PCA for kidney samples specified by location of stranding: area 1 (blue boxes), area 2 (red dots), and area 3 (green triangles). PC - principal component

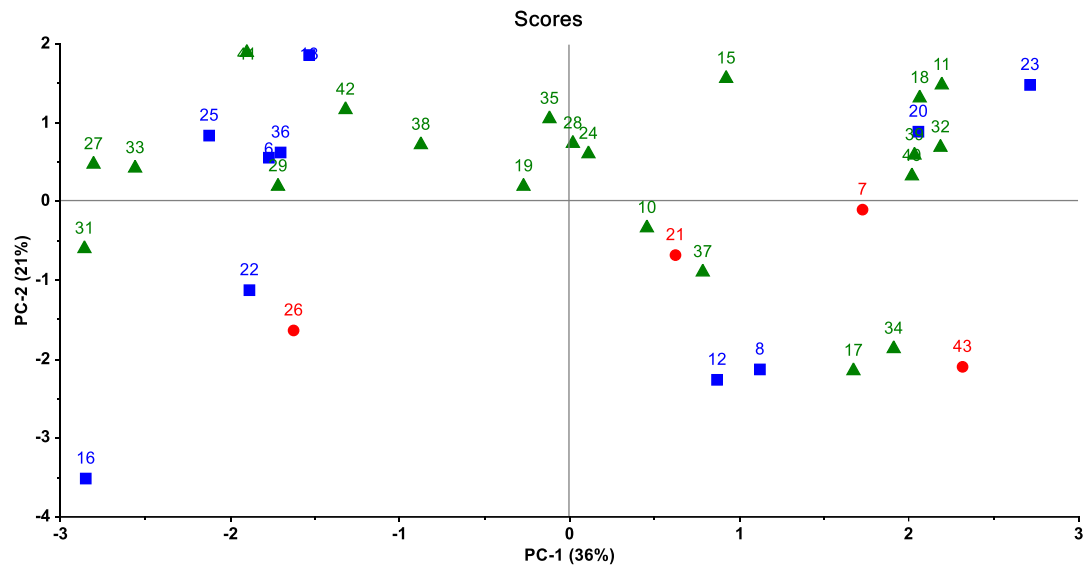

**Fig. S2** Loadings plot of PCA for kidney samples

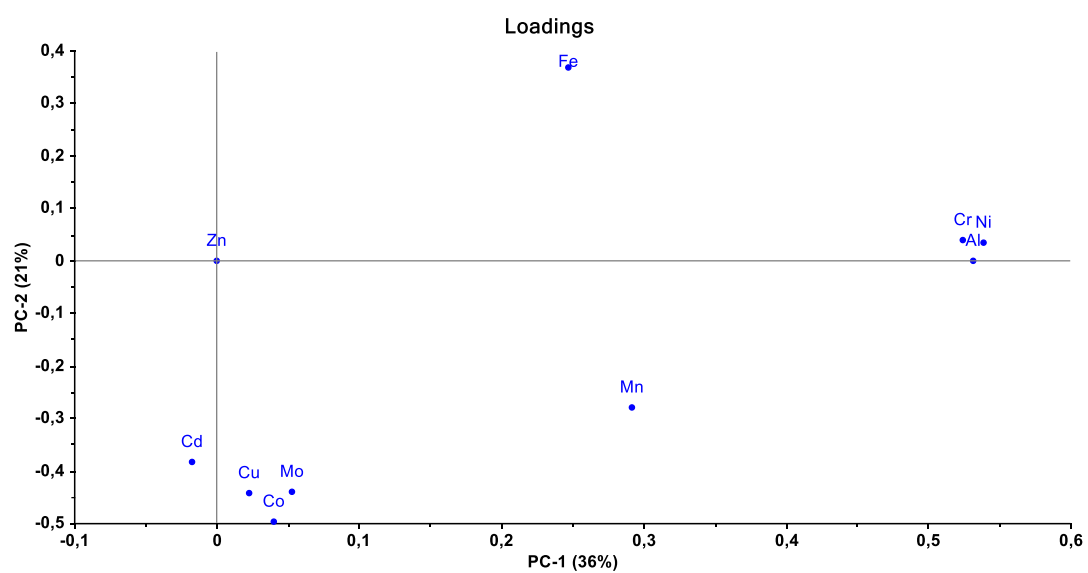

Supplement: Supplementary file 1 [file 1fe594805d10e7f75f2d4369.pdf]
